# Supplementary material for: An Activation-Specific Anti-Mac-1 Designed-Ankyrin-Repeat-Protein Attenuates Colitis in Mice
Source: MDPI journal article supplement (doi:10.3390/life13071464), 2023-06-28
Supplement: s1 [file s1]

# An Activation-Specific Anti-Mac-1 Designed-Ankyrin-Repeat-Protein Attenuates Colitis in Mice

Istvan Bojti <sup>1,\*</sup>, Qianqi Wang <sup>1</sup>, Tibor Bojti <sup>1</sup>, Felicitas Bojti <sup>1</sup>, Patrick Malcolm Siegel <sup>1</sup>, Timo Heidt <sup>1</sup>, Martin Moser <sup>1</sup>, Christoph Bode <sup>1</sup>, Dirk Westermann <sup>1</sup>, Karlheinz Peter <sup>2,3,4</sup> and Philipp Diehl <sup>1</sup>

<sup>1</sup> Department of Cardiology and Angiology, University Heart Center Freiburg—Bad Krozingen, Faculty of Medicine, University of Freiburg, Hugstetter Street 55, 79106 Freiburg, Germany

<sup>2</sup> Atherothrombosis and Vascular Biology Laboratory, Baker Heart and Diabetes Institute, Melbourne, VIC 3004, Australia

<sup>3</sup> Department of Medicine, Central Clinical School, Monash University, Melbourne, VIC 3004, Australia

<sup>4</sup> Department of Cardiometabolic Health, University of Melbourne, Melbourne, VIC 3004, Australia

\* Correspondence: istvan.bojti@uniklinik-freiburg.de; Tel: +49-761/270-34010

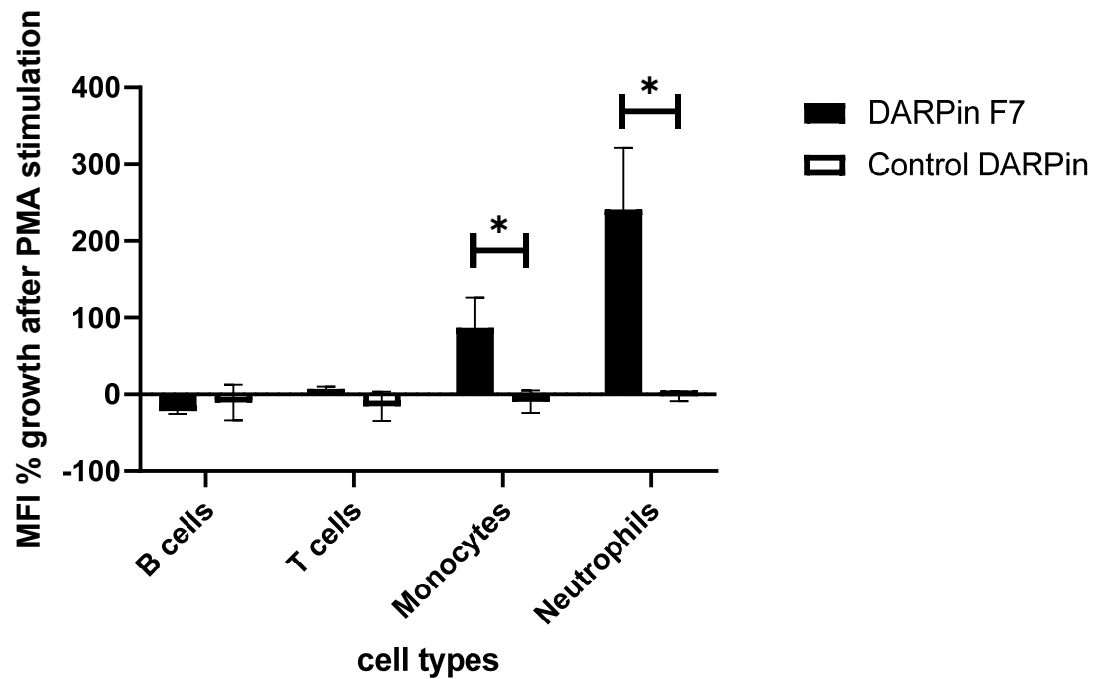

*Supplementary Figure S1:* There was a significant growth of the mean Alexa fluor 488 fluorescent intensity (MFI) after Phorbol-12-myristat-13-acetat (PMA) stimulation in the examined cell populations. Mean MFI growth % in B-cells, T-cells, monocytes and neutrophils respectively (DARPin F7 vs Control DARPin): -22 (SD: 3.6) vs. -10.5 (SD: 23.3), 7.3 (SD: 3) vs. -15 (SD: 19), 86.8 (SD: 39.3) vs. -9.6 (SD: 14.7), 241 (SD: 80) vs. -2.5 (SD: 6.3). 100µl freshly obtained heparinized blood was stimulated with PMA or PBS + Ca<sup>2+</sup> and Mg<sup>2+</sup> as negative control. After red blood cell lysis and centrifugation cells were resuspended in 100 µl PBS + Ca<sup>2+</sup> and Mg<sup>2+</sup> + 0.1% BSA. After binding with DARPins (F7 and E3\_5) for 15 min on ice, mouse leukocytes were stained with CD45 (BV510), CD3 (PerCP-Cy5-5), CD19 (PE-Cy7), CD11b, (PE-Texas Red), Ly6G (PE), Ly6C (V450) and anti-His (AF488). B-cells: CD45+CD19+, T-cells: CD45+CD3+, Monocytes: CD45+CD11b+Ly6C+Ly6C-, Neutrophils: CD45+CD11b+Ly6C+Ly6C+. Abbreviations: MFI: mean fluorescent intensity, PMA: Phorbol-12-myristat-13-acetat, DARPin: Designed Ankyrin Repeat Proteins, PBS: phosphate buffered saline.

| Days | DARPin F7 |       | PBS   |       | Control DARPin |        | p-value          |                             |
|------|-----------|-------|-------|-------|----------------|--------|------------------|-----------------------------|
|      | Mean      | SD    | Mean  | SD    | Mean           | SD     | DARPinF7 vs. PBS | DARPinF7 vs. Control DARPin |
| 1    | 100       | 0     | 100   | 0     | 100            | 0      |                  |                             |
| 2    | 97,81     | 2,27  | 99,34 | 1,597 | 99,21          | 1,97   | 0,20             | 0,16                        |
| 3    | 97,42     | 3,14  | 100,6 | 2,489 | 99,09          | 0,8277 | 0,07             | 0,12                        |
| 4    | 97,91     | 3,64  | 98,84 | 2,206 | 99,06          | 1,168  | 0,61             | 0,35                        |
| 5    | 98,01     | 3,37  | 99,41 | 1,123 | 98,64          | 1,561  | 0,39             | 0,60                        |
| 6    | 96,86     | 3,012 | 96,54 | 2,515 | 96,19          | 1,772  | 0,84             | 0,55                        |
| 7    | 92,32     | 3,38  | 88,78 | 2,903 | 91,52          | 1,882  | 0,07             | 0,52                        |
| 8    | 90,1      | 3,38  | 86,52 | 2,63  | 88,2           | 2,069  | 0,06             | 0,15                        |
| 9    | 89,57     | 2,8   | 84,22 | 3,343 | 85,26          | 2,669  | <b>0,01</b>      | <b>&lt;0,01</b>             |
| 10   | 91,31     | 2,79  | 85,75 | 4,561 | 84,91          | 3,263  | <b>0,01</b>      | <b>&lt;0,01</b>             |
| 11   | 96,79     | 3,39  | 86,22 | 5,012 | 88,07          | 4,851  | <b>&lt;0,01</b>  | <b>&lt;0,01</b>             |
| 12   | 98,51     | 3,98  | 89,73 | 5,697 | 90,83          | 5,266  | <b>&lt;0,01</b>  | <b>&lt;0,01</b>             |

*Supplementary Table S1:* Weight loss comparison of the three treatment groups. Pairwise comparisons were performed on each day of the experiment. A two-tailed student's t-test was used when means of two groups were compared.

Abbreviations: DARPin: Designed Ankyrin Repeat Proteins, SD: standard deviation.

| Days | DARPin F7 |      | PBS  |      | Control DARPin |      | p-value          |                             |
|------|-----------|------|------|------|----------------|------|------------------|-----------------------------|
|      | Mean      | SD   | Mean | SD   | Mean           | SD   | DARPinF7 vs. PBS | DARPinF7 vs. Control DARPin |
| 1    | 0,00      | 0,00 | 0,00 | 0,00 | 0,00           | 0,00 |                  |                             |
| 2    | 0,27      | 0,17 | 0,14 | 0,17 | 0,16           | 0,17 | 0,11             | 0,14                        |
| 3    | 0,30      | 0,18 | 0,14 | 0,18 | 0,20           | 0,17 | 0,11             | 0,23                        |
| 4    | 0,27      | 0,37 | 0,57 | 0,37 | 0,33           | 0,38 | <b>0,05</b>      | 0,64                        |
| 5    | 0,23      | 0,36 | 0,95 | 0,36 | 0,83           | 0,24 | <b>&lt;0,01</b>  | <b>&lt;0,01</b>             |
| 6    | 0,80      | 0,51 | 1,67 | 0,51 | 1,67           | 0,74 | <b>&lt;0,01</b>  | <b>&lt;0,01</b>             |
| 7    | 1,80      | 0,66 | 2,57 | 0,66 | 2,47           | 0,71 | 0,07             | 0,08                        |
| 8    | 1,97      | 0,58 | 2,56 | 0,58 | 2,63           | 1,07 | <b>0,04</b>      | 0,08                        |
| 9    | 1,70      | 0,65 | 2,39 | 0,65 | 2,93           | 1,13 | 0,07             | <b>&lt;0,01</b>             |
| 10   | 1,23      | 1,00 | 1,78 | 1,00 | 3,00           | 1,19 | 0,22             | <b>&lt;0,01</b>             |
| 11   | 0,43      | 1,16 | 1,67 | 1,16 | 2,40           | 1,31 | <b>&lt;0,01</b>  | <b>&lt;0,01</b>             |
| 12   | 0,33      | 0,87 | 1,13 | 0,87 | 1,63           | 1,22 | <b>0,03</b>      | <b>&lt;0,01</b>             |

*Supplementary Table S2:* Disease activity score of the three treatment groups. Pairwise comparisons were performed on each day of the experiment. A two-tailed student's t-test was used when means of two groups were compared.

Abbreviations: DARPin: Designed Ankyrin Repeat Proteins, SD: standard deviation.
